# Supplementary material
Source: PubMed Central journal article supplement (PMC9177635)

# Source Data Extended Figure 4

Unprocessed Western Blots shown in Extended Figure 4g  
Control Lanes 1 - 5, TrkB.T1 KD Lanes 6 - 11

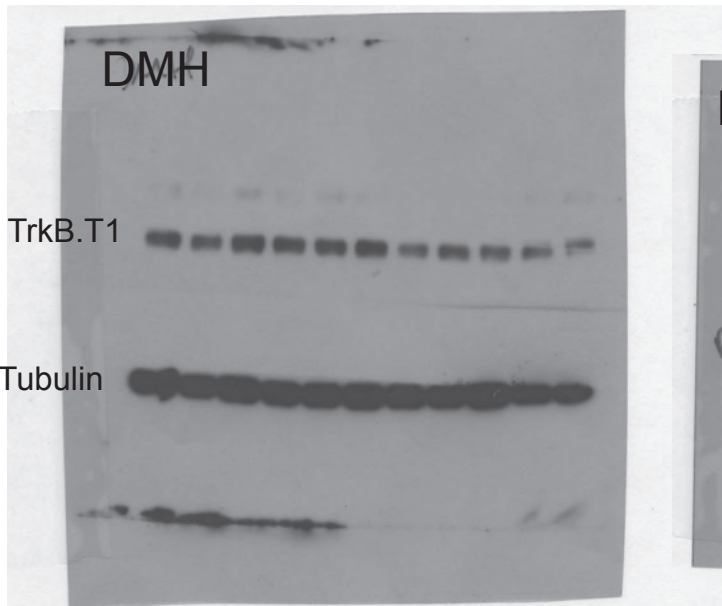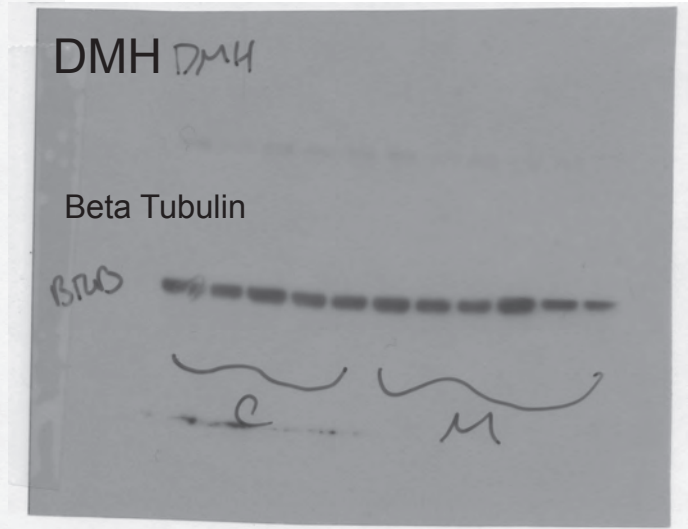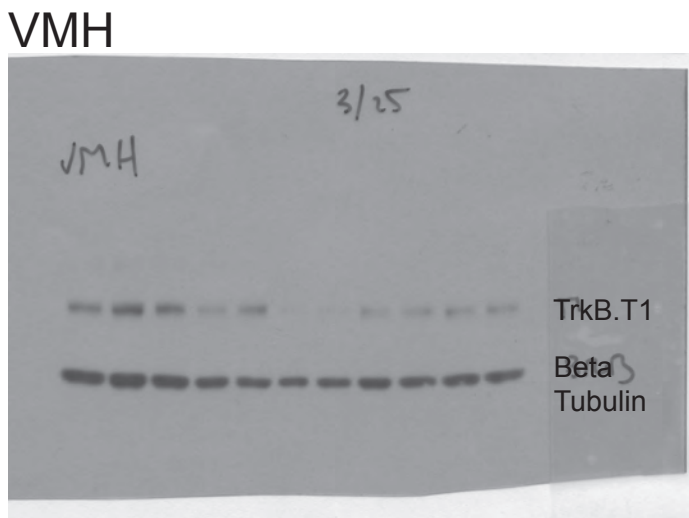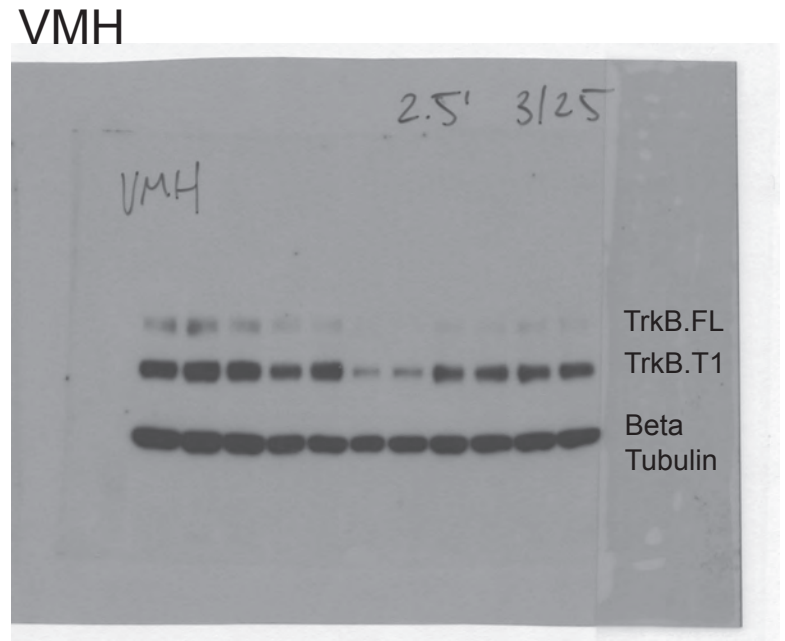

Supplement: NIHMS1793524-supplement-Source_Data_Extended_Figure_4_Western_blots.pdf [file NIHMS1793524-supplement-Source_Data_Extended_Figure_4_Western_blots.pdf]
