# Supplementary material
Source: PubMed Central journal article supplement (PMC9177635)

# Source Data Extended Figure 6

Unprocessed Western Blots quantified in Extended Figure 6

Blots used for quantification: Control Lanes 1 - 3, Neuronal TrkB KD Lanes 4 - 7

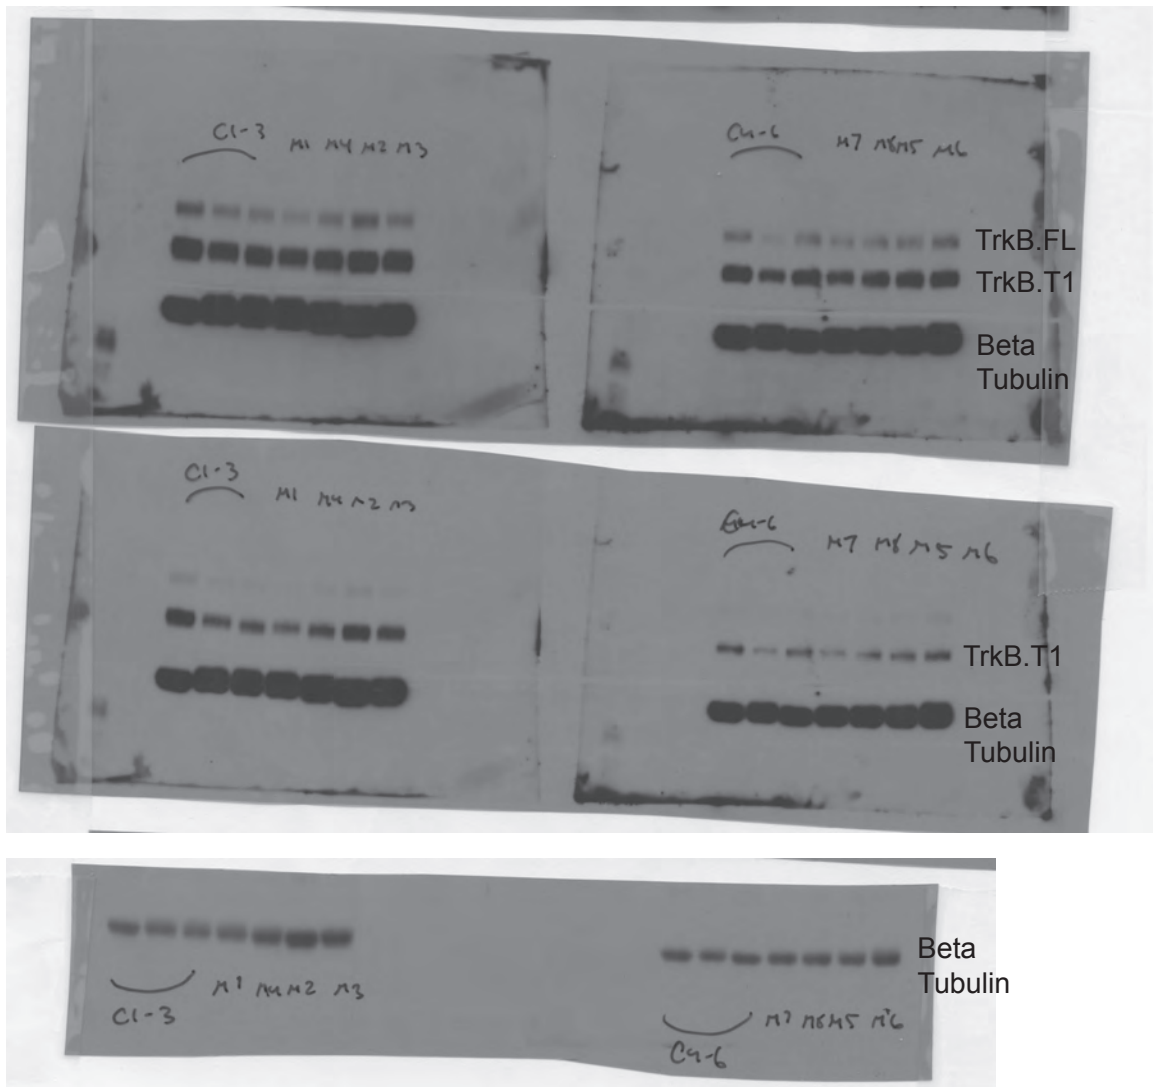

Western Blot shown in Extended Figure 6c, sample numbers are the same as shown above  
Control Lanes 1 - 2, Neuronal TrkB KD Lanes 3 - 5

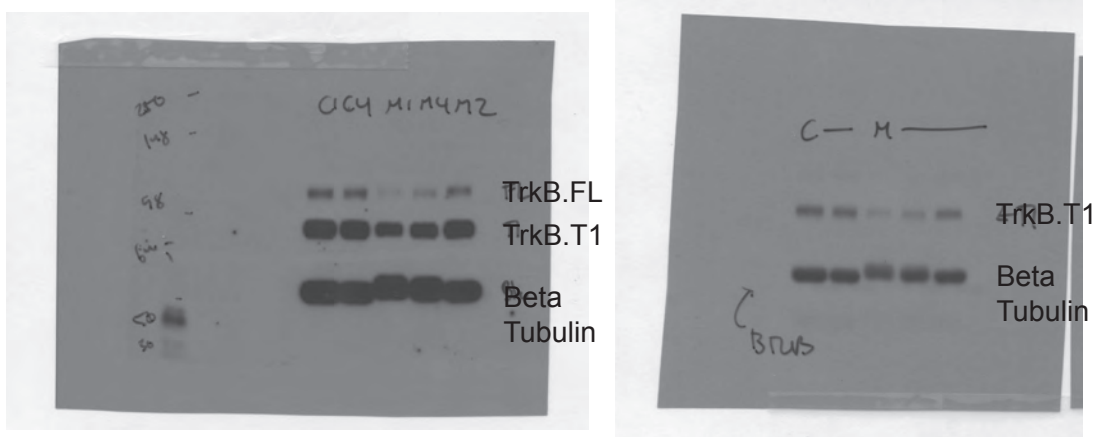

Supplement: NIHMS1793524-supplement-Source_Data_Extended_Figure_6_Western_blots.pdf [file NIHMS1793524-supplement-Source_Data_Extended_Figure_6_Western_blots.pdf]
