# Supplementary material
Source: PubMed Central journal article supplement (PMC9177635)
Supplement: NIHMS1793524-supplement-Source_Data_Figure_2_Western_blots.pdf [file NIHMS1793524-supplement-Source_Data_Figure_2_Western_blots.pdf]

# Source Data Figure 2

Unprocessed Western Blots quantified in Figure 2a & 2b

WT Fed Lanes 1 - 3, WT Fasted Lanes 4 - 6, Fed BDNF 2L/2L CK:Cre Lanes 8-10

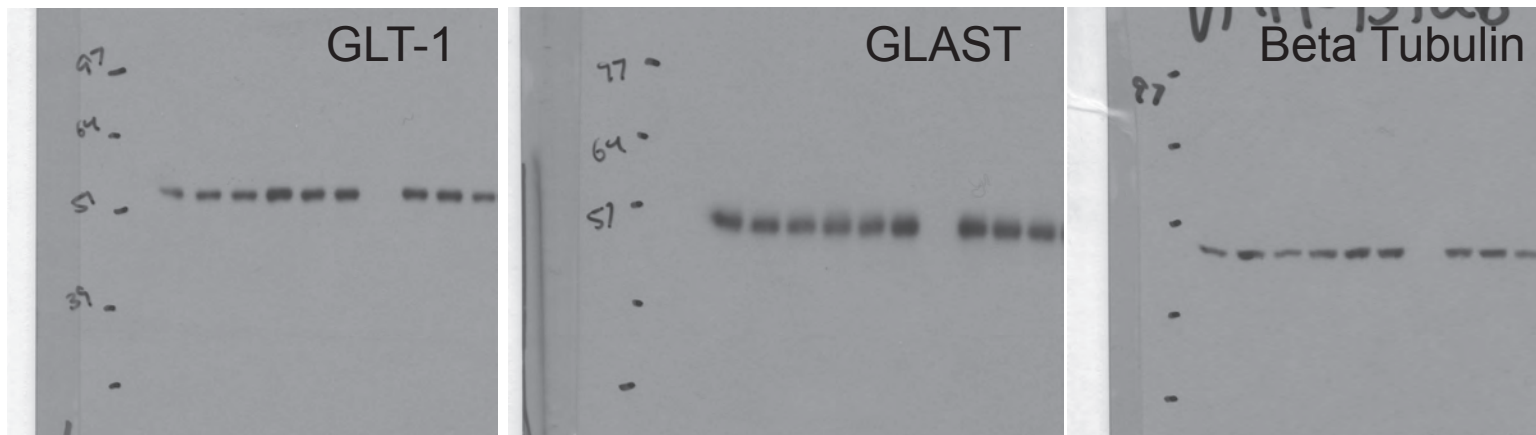

WT Fed Lanes 1 - 3, WT Fasted Lanes 4 - 6, Fed BDNF 2L/2L CK:Cre Lanes 8-10

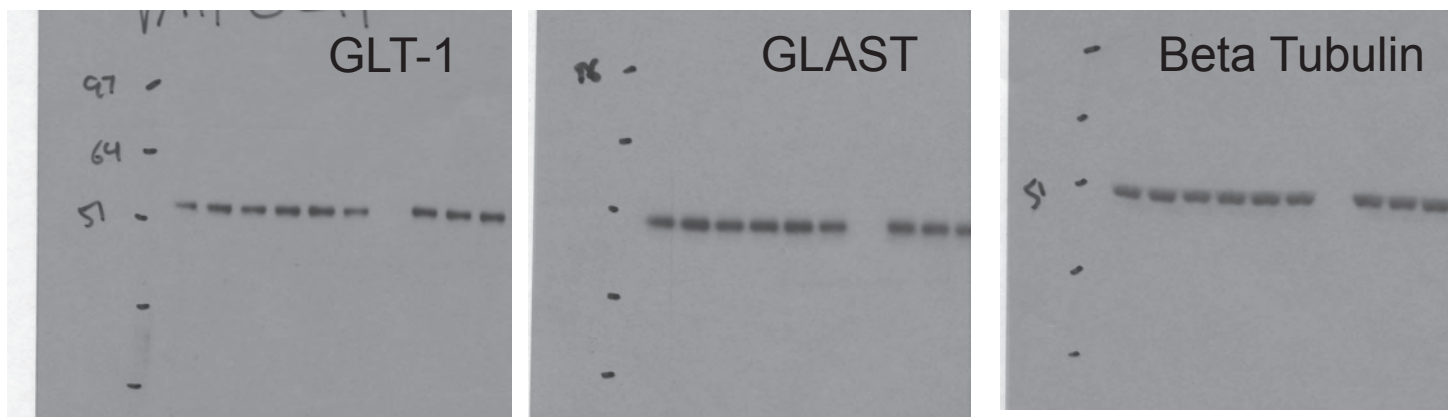

WT Fed Lanes 1 - 4 & 10, WT Fasted Lanes 5 - 8 & 12, Fed BDNF 2L/2L CK:Cre Lane 9 & 11

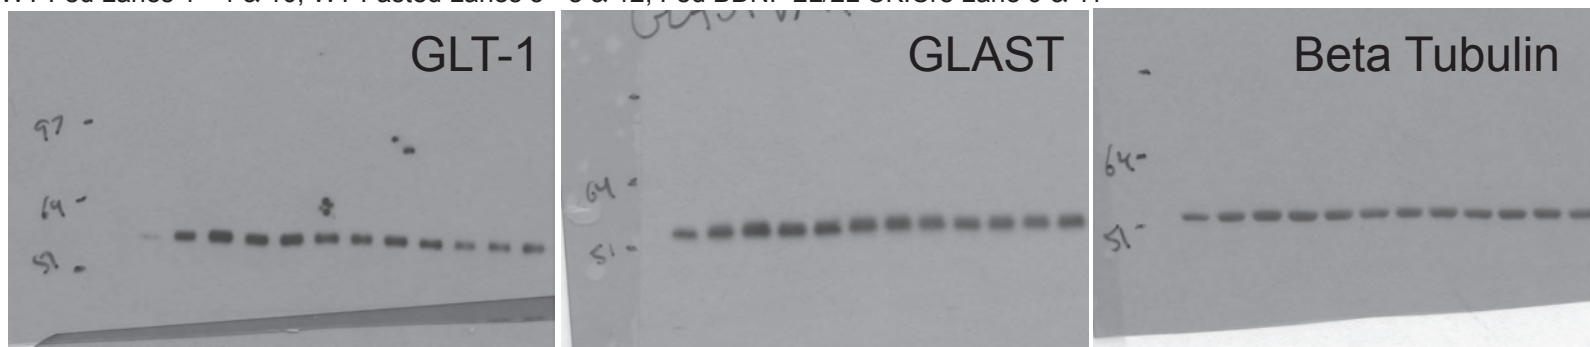

WT Fed Lanes 2 - 3, WT Fasted Lanes 5 - 6, Fed BDNF 2L/2L CK:Cre Lanes 8-10

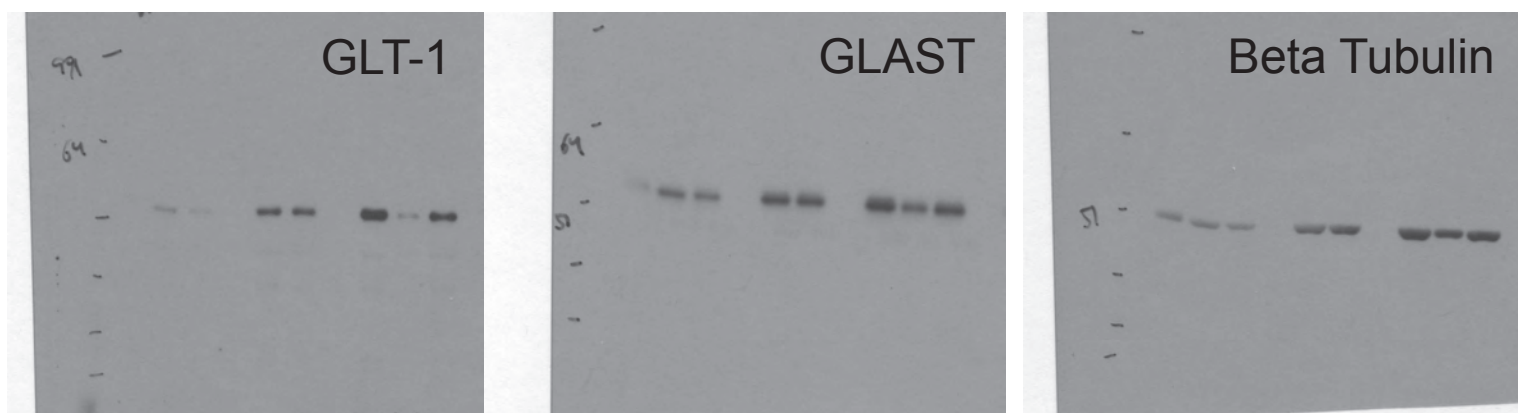

# Source Data Figure 2

Unprocessed Western Blot presented in Figure 2C

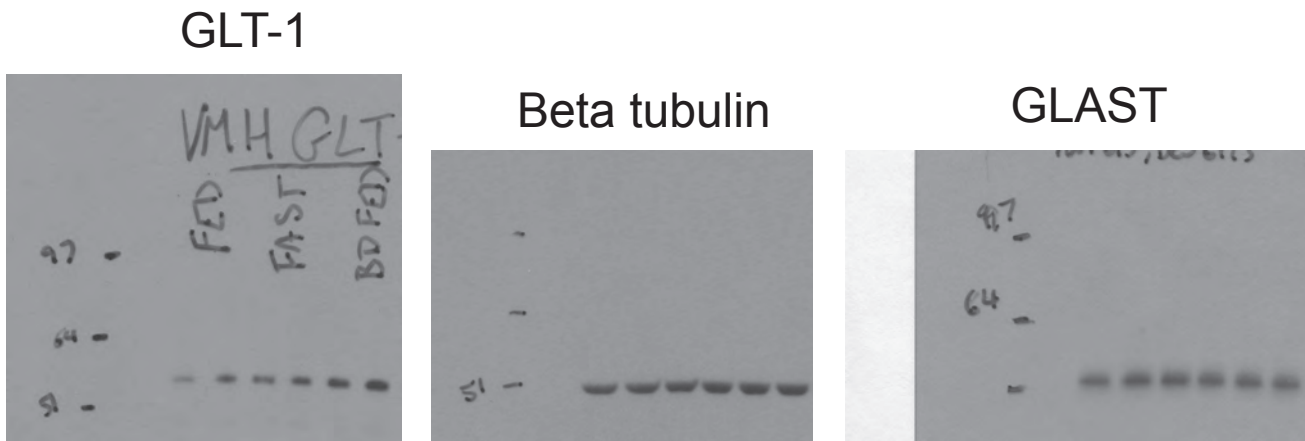

WT Fed Lanes 1 & 2, WT Fasted Lanes 3 & 4, Fed BDNF 2L/2L CK:Cre Lanes 5 & 6
