# Supplementary material
Source: PubMed Central journal article supplement (PMC9177635)

# Source Data Figure 3

Unprocessed Images of western blots used in Figure 3a  
All VMH from WT C57Bl6 Fed Mice

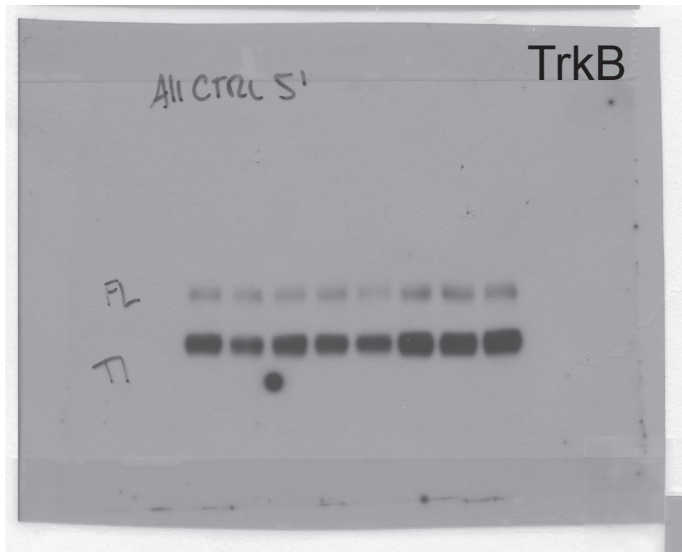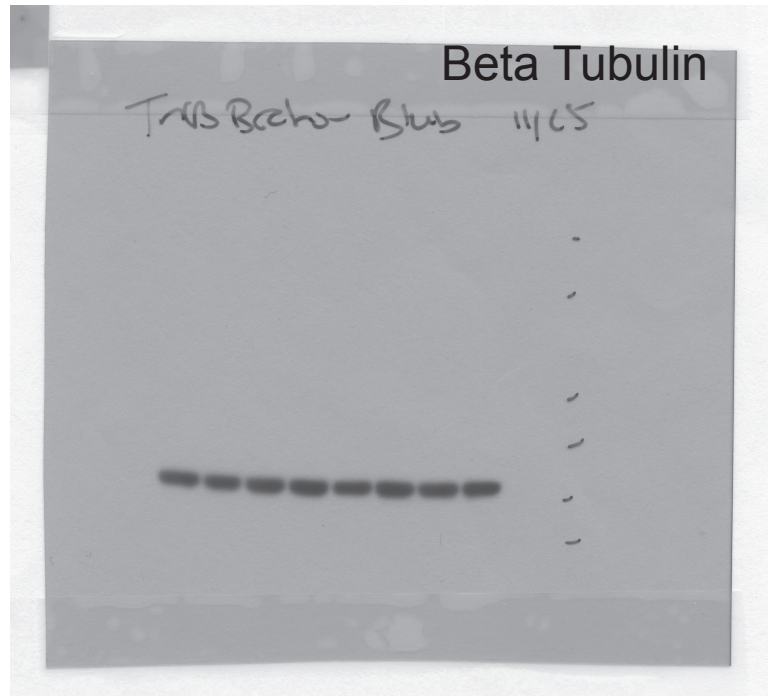

Unprocessed Images of western blots used in Figure 3e  
Control Lanes 1 - 5, TrkB.T1 KD lanes 7 - 11

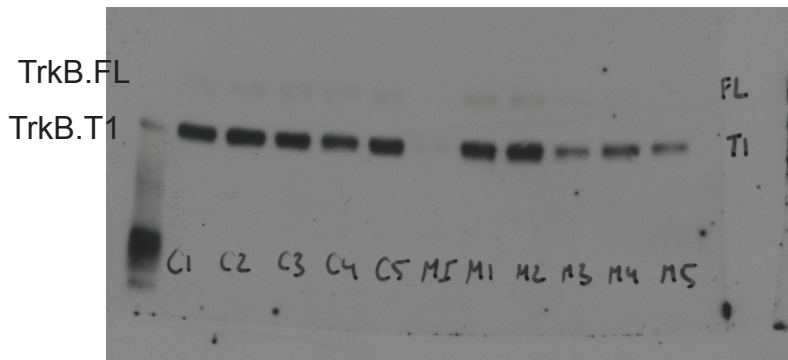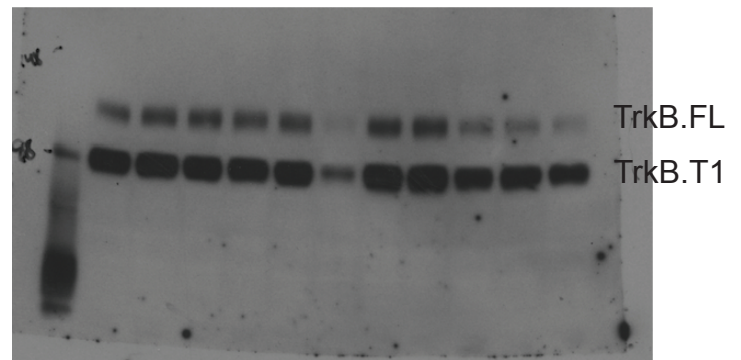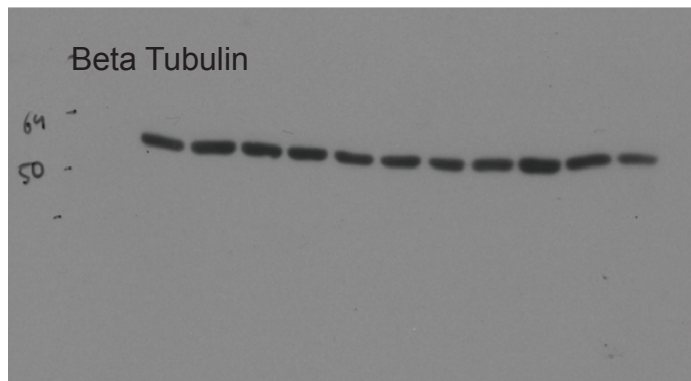

Supplement: NIHMS1793524-supplement-Source_Data_Figure_3_Western_blots.pdf [file NIHMS1793524-supplement-Source_Data_Figure_3_Western_blots.pdf]
