# Supplementary material
Source: PubMed Central journal article supplement (PMC9177635)
Supplement: NIHMS1793524-supplement-Supplementary_Information.pdf [file NIHMS1793524-supplement-Supplementary_Information.pdf]

| Primer                     | FW                       | RV                       | Citation                         |
|----------------------------|--------------------------|--------------------------|----------------------------------|
| GAPDH (300 nM)             | GGGAGCCAAAAGGGTCATCA     | TGGTTCACACCCATGACGAA     | Primer Blast                     |
| TrkB.T1 (600 nM)           | TGGTGATGTTGCTCCTGCTCA    | CCCATCCAGTGGGATCTTATGAAA | Renn et al., 2009 <sup>66</sup>  |
| TrkB. FL (600 nM)          | ACTTTGCGATCACCAACAGTCAGC | AGGTTGTAGCACTCGGCAAGGAAA | Renn et al., 2009 <sup>66</sup>  |
| $\beta$ 3 Tubulin (150 nM) | TAGACCCCAGCGGCAACTAT     | GTTCCAGGTTCCAAGTCCACC    | This paper-Primer Bank           |
| GLT-1 (600-300nM)          | ACAATATGCCCAAGCAGGTAG    | GACACCAAACACAGTCAGTGA    | Morel et al., 2014 <sup>67</sup> |

### Supplementary Table 1

Primers used for quantitative RT-PCR analysis
