# Supplementary material
Source: PubMed Central journal article supplement (PMC9177635)

# Source Data Figure 6

Unprocessed Western Blots shown in Figure 6c  
Control Lanes 1 - 5, TrkB.T1 KD Lanes 6 - 10

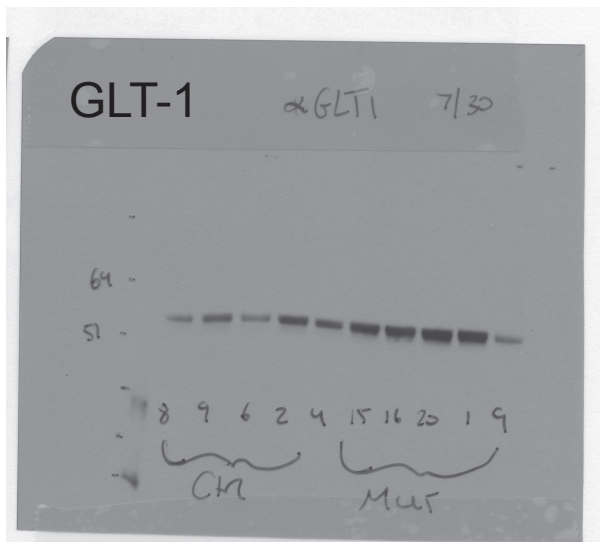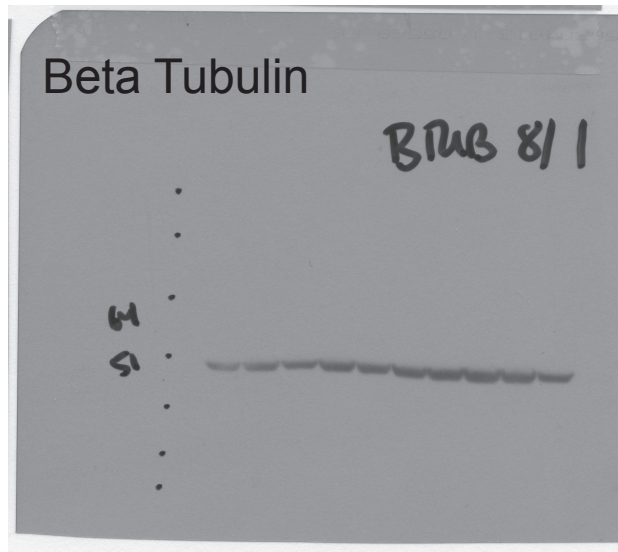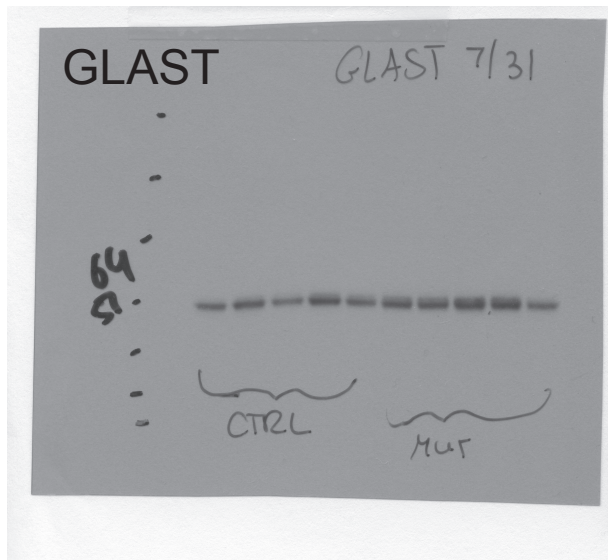

Supplement: NIHMS1793524-supplement-Source_Data_Figure_6_Western_blots.pdf [file NIHMS1793524-supplement-Source_Data_Figure_6_Western_blots.pdf]
